# Supplementary material for: Solvothermal synthesis, crystal structure and photoluminescence properties of four Cd(ii) coordination polymers with different topological structures
Source: Royal Society of Chemistry journal article supplement (doi:10.1039/c4ra10039e), 2014-01-01
Supplement: c4ra10039e1.pdf [file c4ra10039e1.pdf]

*Supporting Information for RSC Advances*

**Solvothermal Synthesis, Crystal Structure and Photoluminescence Properties of four Cd(II) Coordination Polymers With Different Topological Structures**

**Zhi-Hao Yan<sup>\*,†</sup>, Xiao-Wei Zhang<sup>\*,†</sup>, Haiduo Pang,<sup>†</sup> Yiheng Zhang,<sup>†</sup> Daofeng Sun,<sup>\*,‡</sup> and Lei Wang<sup>\*,†</sup>**

*<sup>†</sup>Key Laboratory of Eco-chemical Engineering, Ministry of Education, College of Chemistry and Molecular Engineering, Qingdao University of Science and Technology, Qingdao 266042, P. R. China.*

*<sup>‡</sup>College of Science, China University of Petroleum (East China), Qingdao, Shandong 266580, People ' s Republic of China.*

*E-mail: inorchemwl@126.com (L.W.); dfsun@upc.edu.cn (D.F.S)*

*Received (in XXX, XXX) Xth XXXXXXXXX 2014, Accepted Xth XXXXXXXXX 2014*

**(1) Fig. S1: The powder XRD patterns and the simulated one from the single-crystal diffraction data for compounds 1-4**

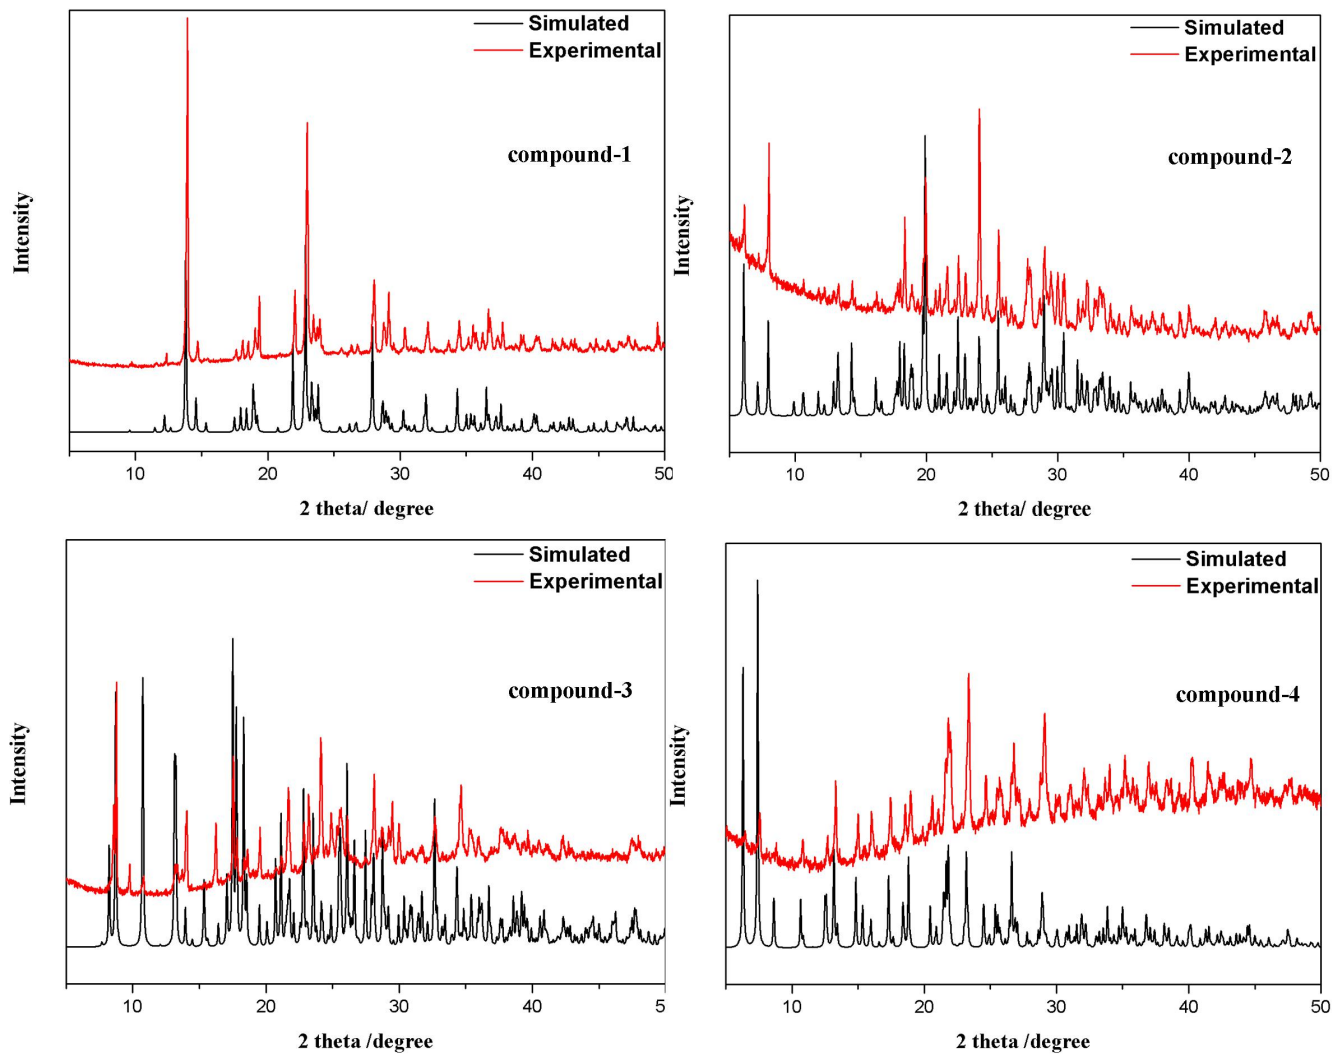

(2) Fig. S2 IR spectrum of 1-4.

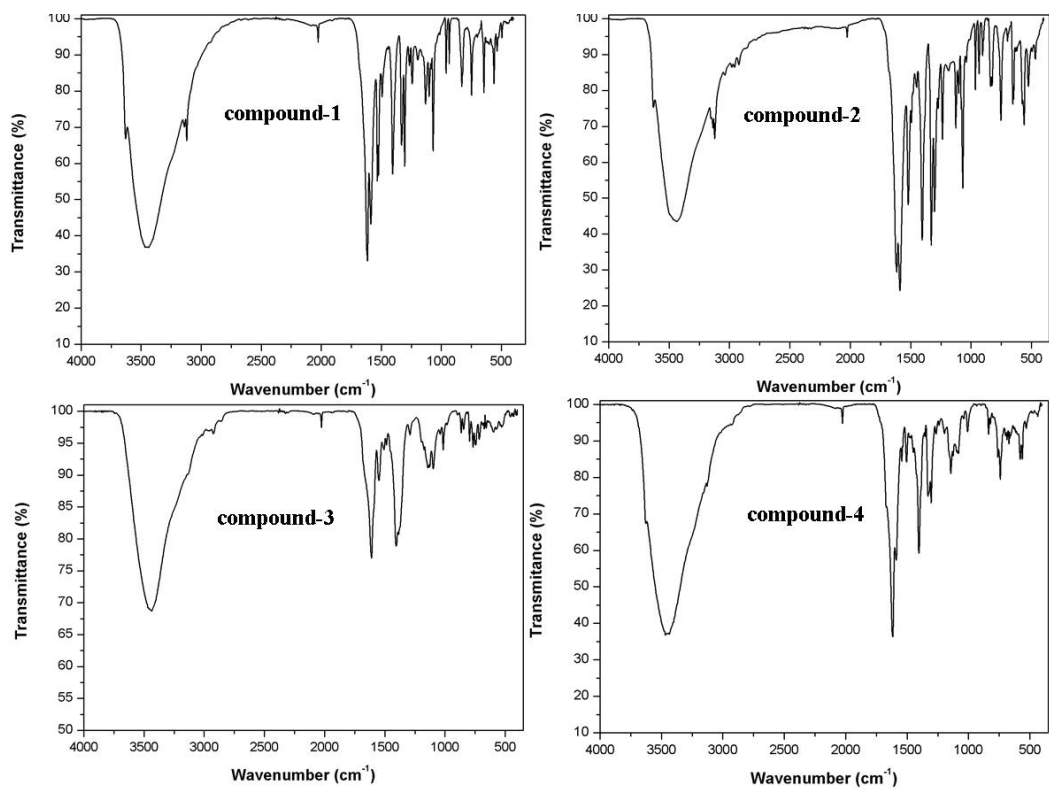

**(3) Table S1 The hydrogen bond geometries for 2.**

| Compound 2                        |            |              |              |                |
|-----------------------------------|------------|--------------|--------------|----------------|
| <i>D-H...A</i>                    | <i>D-H</i> | <i>H...A</i> | <i>D...A</i> | <i>D-H...A</i> |
| O4-H4A ...O1W                     | 0.87       | 2.46         | 2.963 (4)    | 115            |
| O2-H4B ...O1W                     | 0.87       | 2.10         | 2.749 (5)    | 130            |
| O2W-H2B ...O2W                    | 0.86       | 2.20         | 2.873(4)     | 135            |
| Symmetry code: (v) -x, -y+1, -z+1 |            |              |              |                |
